# Supplementary material for: Acid- and hydrogen-bonding-induced switching between 22-π and 18-π electron conjugations in 2-aminothiazolo[4,5-c]porphycenes
Source: Royal Society of Chemistry journal article supplement (doi:10.1039/c7cp02938a), 2017-01-01
Supplement: c7cp02938a1.pdf [file c7cp02938a1.pdf]

# Acid- and *hydrogen*-bonding-induced switching between 22- $\pi$ and 18- $\pi$ electron conjugation in 2-aminothiazolo[4,5c]porphycenes

Oriol Planas,<sup>a</sup> Daniel Fernández-Llaneza,<sup>a</sup> Ingrid Nieves,<sup>a</sup> Rubén Ruiz-Gonzalez,<sup>a</sup> Else Lemp,<sup>b</sup> Antonio Zanoocco,<sup>b</sup> and Santi Nonell<sup>a,\*</sup>

a. Institut Químic de Sarrià, Universitat Ramon Llull, Via Augusta 390, Barcelona 08017, Spain. E-mail: santi.nonell@iqs.url.edu

b. Facultad de Ciencias Químicas y Farmacéuticas, Universidad de Chile, Sergio Livingstone 1007, Santiago, Chile.

|                                                                                                                                     |    |
|-------------------------------------------------------------------------------------------------------------------------------------|----|
| 1. Further instrumentation and materials.....                                                                                       | 2  |
| 1.1 Techniques for the characterization and identification of compounds .....                                                       | 2  |
| 1.2 Fluorescence emission of porphycene-labelled conjugates .....                                                                   | 2  |
| 2. Synthesis of porphycene derivatives .....                                                                                        | 3  |
| 2.1 Synthesis of 9-isothiocyanate-2,7,12,17-tetraphenylporphycene .....                                                             | 3  |
| 2.2 Synthesis of 2-( <i>N</i> -butylamino)thiazolo[4,5-c]2,7,12,17-tetraphenylporphycene .....                                      | 3  |
| 2.3 Synthesis of 2-phenylthiazolo[4,5-c]2,7,12,17-tetraphenylporphycene.....                                                        | 4  |
| 2.4 Synthesis of 2-( <i>N,N</i> -diethylamino)thiazolo[4,5-c]2,7,12,17-tetraphenylporphycene.....                                   | 5  |
| 3. Additional experiments .....                                                                                                     | 6  |
| 3.1 HFIP effects on the absorption and fluorescence emission spectra of ATAZPo 2.....                                               | 6  |
| 3.2 Excitation spectra of ATAZPo 2 in different solvents .....                                                                      | 7  |
| 3.3 Linear solvation energy relationships .....                                                                                     | 7  |
| 3.4 Acid effect on the absorption and fluorescence emission spectra of ATAZPo 2.....                                                | 8  |
| 3.5 HFIP and acid effects on the absorption and fluorescence emission spectra of 2,7,12,17-tetraphenylporphycene .....              | 10 |
| 3.6 HFIP and acid effects on the absorption spectra of 9-amino-2,7,12,17-tetrakis(2-methoxyethyl)porphycene .....                   | 11 |
| 3.7 HFIP effects on the absorption and fluorescence emission spectra of 2-phenylthiazolo[4,5-c]2,7,12,17-tetraphenylporphycene..... | 11 |
| 3.8 HFIP and acid effects on the absorption and fluorescence emission spectra of ATAZPo 4.....                                      | 12 |
| 4. References.....                                                                                                                  | 12 |

## 1. Further instrumentation and materials

### 1.1 Techniques for the characterization and identification of compounds

$^1\text{H}$  and  $^{13}\text{C}$ -NMR spectra were recorded on a Varian 400-MR spectrometer working at 400 MHz for  $^1\text{H}$  or 100.6 MHz for  $^{13}\text{C}$ . All NMR data were obtained in  $\text{CDCl}_3$ . Chemical shifts are reported in parts per million (ppm,  $\delta$ ) and are referenced to the residual signal of the solvent. Coupling constants are reported in Hertz (Hz). Spectral splitting patterns are designated as s (singlet), d (doublet), t (triplet), q (quartet), m (complex multiplet).

HPLC-MS analysis was carried out in an Agilent 1260 infinity Series chromatograph equipped with photodiode array detector (200–600 nm) and coupled to an Agilent 6130 quadrupole LC/MS. Separation was achieved using a Discovery® C18 (15m x 4.6 mm, 5 $\mu\text{m}$  particle size) column and an ACN:MeOH 85:15 mixture at 1.0 mL/min flow rate. The DAD detector was set at 400 nm matching the Soret band of porphycenes. API-ES positive ionization mode at 80V cone voltage was used. Fragmentations were scanned from 500 to 2500 m/z. Peaks were identified by their characteristic MS fragmentations.

### 1.2 Fluorescence emission of porphycene-labelled conjugates

Fluorescence emission of porphycene-labelled tetraethylen-glycol undecyl-thiol stabilized gold nanoclusters at different pH were measured by dissolving the conjugate in citric acid/ $\text{Na}_2\text{HPO}_4$  buffer of different concentrations. Table S1 shows the proportions of solutions of citric acid 0.1 M and  $\text{Na}_2\text{HPO}_4$  0.2 M to prepare 100 mL of buffer at different pH.

**Table S1:** Amounts of citric acid 0.1 M and  $\text{Na}_2\text{HPO}_4$  0.2 M to prepare 100 mL of buffer at different pH

| pH  | Citric acid 0.1 M<br>solution / mL | $\text{Na}_2\text{HPO}_4$ 0.2 M<br>solution / mL |
|-----|------------------------------------|--------------------------------------------------|
| 2.6 | 89.10                              | 10.90                                            |
| 3.0 | 79.45                              | 20.55                                            |
| 3.6 | 67.80                              | 32.20                                            |
| 4.0 | 61.45                              | 38.55                                            |
| 4.6 | 53.25                              | 46.75                                            |
| 5.0 | 48.50                              | 51.50                                            |
| 5.6 | 42.00                              | 58.00                                            |
| 6.0 | 36.85                              | 63.15                                            |
| 6.6 | 27.25                              | 72.75                                            |
| 7.0 | 17.65                              | 82.35                                            |
| 7.6 | 6.35                               | 93.65                                            |

## 2. Synthesis of porphycene derivatives

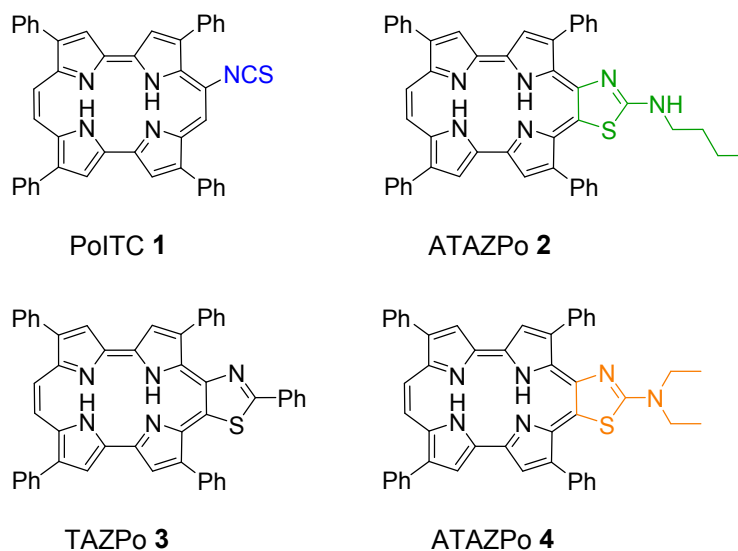

**Figure S1:** Chemical structures of 9-isothiocyanate-2,7,12,17-tetraphenylporphycene, 2-(*N*-butylamino)-thiazolo[4,5-*c*]2,7,12,17-tetraphenylporphycene, 2-phenylthiazolo[4,5-*c*]2,7,12,17-tetraphenylporphycene and 2-(*N,N*-diethylamino)thiazolo[4,5-*c*]2,7,12,17-tetraphenylporphycene; PoITC 1, ATAZPo 2, TAZPo 3, and ATAZPo 4 respectively.

### 2.1 Synthesis of 9-isothiocyanate-2,7,12,17-tetraphenylporphycene

9-isothiocyanate-2,7,12,17-tetraphenylporphycene (PoITC 1 in Figure S1) was prepared in agreement with previously reported synthetic procedures.<sup>1</sup> Briefly, 9-amino-2,7,12,17-tetraphenylporphycene (50 mg,  $7.5 \cdot 10^{-2}$  mmol) was stirred with 1,1'-thiocarbonyldi-2(1H)-pyridone (53 mg, 3 eq, 0.23 mmol) in 10 mL of  $\text{CH}_2\text{Cl}_2$  for 16 h at room temperature. The solvent was evaporated and the mixture purified by silica gel chromatography eluting with  $\text{CH}_2\text{Cl}_2$ . The product was then crystallized by dissolving it in toluene (5 mL) and pouring it in acetonitrile (50 mL), to provide a blue-greenish product (38 mg,  $5.6 \cdot 10^{-2}$  mmol, 75 %).  $^1\text{H}$  NMR (400 MHz,  $\text{CDCl}_3$ )  $\delta/\text{ppm}$  = 9.70 – 9.61 (ABq, 2H,  $J_{\text{AB}}$  = 11.0 Hz), 9.55 (s, 1H), 9.43 (s, 1H), 9.39 (s, 2H), 9.30 (s, 1H), 8.29 – 8.19 (m, 6H), 8.08 – 8.00 (m, 2H), 7.88 – 7.59 (m, 12H), 3.77 (s, 1H), 3.29 (s, 1H).  $^{13}\text{C}$  NMR (100 MHz,  $\text{CDCl}_3$ )  $\delta/\text{ppm}$  = 145.5, 145.2, 144.8, 143.6, 143.1, 143.0, 139.9, 138.0, 137.4, 136.1, 135.8, 135.2, 134.8, 134.0, 133.5, 131.5, 131.5, 131.5, 130.9, 129.5, 129.3, 129.3, 128.7, 128.4, 128.2, 127.9, 127.3, 124.1, 124.1, 118.3, 115.6, 115.2, 114.8. MS (API-ES) Calculated for  $\text{C}_{45}\text{H}_{30}\text{N}_5\text{S}$  [(M+H)<sup>+</sup>]: 672.22. Found:  $m/z$ =672.2. Retention time: 21.49 min.

### 2.2 Synthesis of 2-(*N*-butylamino)thiazolo[4,5-*c*]2,7,12,17-tetraphenylporphycene

2-(*N*-butylamino)thiazolo[4,5-*c*]2,7,12,17-tetraphenylporphycene (ATAZPo 2 in Figure S1) was prepared in agreement with previously reported synthetic procedures.<sup>1</sup> Briefly, PoITC 1 (10 mg,  $1.5 \cdot 10^{-2}$  mmol) was stirred with *n*-butylamine (50  $\mu\text{L}$ , 0.6 mmol, 40 eq) in 2 mL of  $\text{CH}_2\text{Cl}_2$  for 5 h at room temperature. Acidic water was added to the mixture and the product was extracted with  $\text{CH}_2\text{Cl}_2$ . The organic layers were washed three times with brine and then dried with anhydrous  $\text{Na}_2\text{SO}_4$ . The solvent was evaporated and the remaining crude was further purified by silica gel

chromatography eluting with *n*-hexane:toluene 1:1 to provide a green product (10 mg,  $1.3 \cdot 10^{-2}$  mmol, 90 %).  $^1\text{H}$  NMR (400 MHz,  $\text{CDCl}_3$ )  $\delta$ /ppm = 9.63 (d,  $J$  = 11.0 Hz, 1H), 9.54 (d,  $J$  = 11.0 Hz, 1H), 9.43 (s, 2H), 9.41 (s, 1H), 9.38 (s, 1H), 8.27 (m, 4H), 8.08 (m, 2H), 7.97 – 7.92 (m, 2H), 7.81 – 7.69 (m, 7H), 7.67 – 7.60 (m, 4H), 7.51 (m, 1H), 5.92 (s, 1H), 5.31 (s, 1H), 5.11 (s, 1H), 3.23 (m, 2H), 1.42 – 1.32 (m, 4H), 0.95 (t,  $J$  = 7.5 Hz, 3H).

$^{13}\text{C}$  NMR (100 MHz,  $\text{CDCl}_3$ )  $\delta$ /ppm = 164.1, 145.0, 144.1, 143.9, 143.4, 142.8, 142.7, 142.6, 140.7, 139.6, 137.8, 136.8, 136.6, 136.5, 135.7, 134.4, 133.9, 131.4, 131.4, 131.1, 130.9, 129.3, 129.1, 129.0, 128.7, 128.0, 127.94, 127.8, 127.8, 126.6, 125.6, 123.6, 123.5, 123.2, 115.7, 112.8, 77.5, 77.2, 76.8, 44.5, 31.9, 20.1, 14.0. MS (API-ES) Calculated for  $\text{C}_{49}\text{H}_{38}\text{N}_6\text{S}$  [(M+H) $^+$ ]: 743.29. Found:  $m/z$ =743.2. Retention time: 14.50 min.

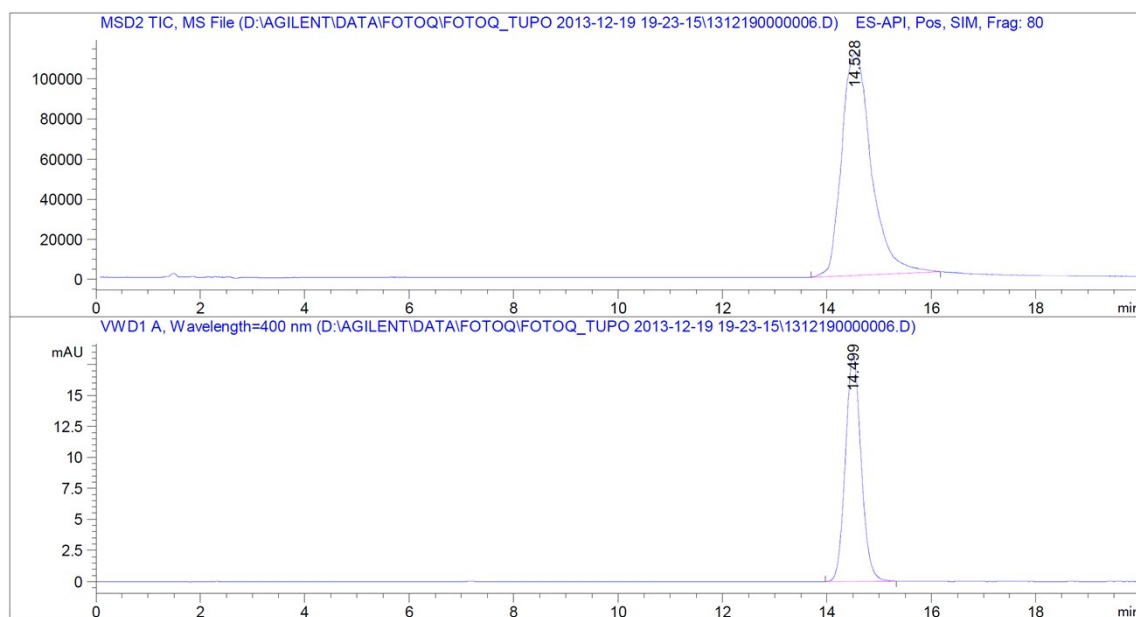

**Figure S2:** Chromatogram of ATAZPo **2** using mass scan mode (top) and UV/Vis detection at 400 nm (bottom).

### 2.3 Synthesis of 2-phenylthiazolo[4,5-*c*]2,7,12,17-tetraphenylporphycene

2-phenylthiazolo[4,5-*c*]2,7,12,17-tetraphenylporphycene (TAZPo **3** in Figure S1) was prepared in agreement with previously reported synthetic procedures.<sup>1</sup> Briefly, to a solution of 9-benzamido-2,7,12,17-tetraphenylporphycene (3 mg,  $4.0 \cdot 10^{-3}$  mmol) in 0.4 mL of toluene were added 4 mg of the Lawesson's reagent ( $1.0 \cdot 10^{-2}$  mmol, 2.5 eq). The mixture was stirred and heated at 120 °C using microwaves for 1.5 h. Then, the solvent was reduced under reduced pressure and the crude was purified by thin layer silica chromatography eluting with toluene to provide a blue-greenish product (2.5 mg, 81%).  $^1\text{H}$  NMR (400 MHz,  $\text{CDCl}_3$ )  $\delta$  9.51 (s, 2H), 9.43 (d,  $J$  = 1.0 Hz, 1H), 9.38 (s, 1H), 9.36 (d,  $J$  = 1.0 Hz, 1H), 9.35 (s, 1H), 8.21 – 8.17 (m, 4H), 8.09 – 8.04 (m, 2H), 7.94 (m, 3H), 7.76 – 7.69 (m, 8H), 7.68 – 7.64 (m, 4H), 7.62 – 7.57 (m, 4H), 5.99 (s, 1H), 5.32 (s, 1H).  $^{13}\text{C}$  NMR (100 MHz,  $\text{CDCl}_3$ ) 174.3, 144.8, 144.7, 142.6, 141.8, 140.5, 139.0, 137.4, 137.4, 136.9, 136.1, 136.0, 133.8, 132.1, 131.2, 131.1, 130.5, 129.5, 129.0, 128.8, 128.1, 127.9, 127.7, 127.1,

126.5, 126.2, 124.3, 123.8, 115.4, 114.7, 114.7. MS (API-ES) Calculated for  $C_{51}H_{34}N_5S [(M+H)^+]$ : 748.9,  $C_{102}H_{67}N_{10}S_2 [(2M+H)^+]$ : 1496.8, Found:  $m/z=748.2$ , 1496.4. Retention time: 3.37 min.

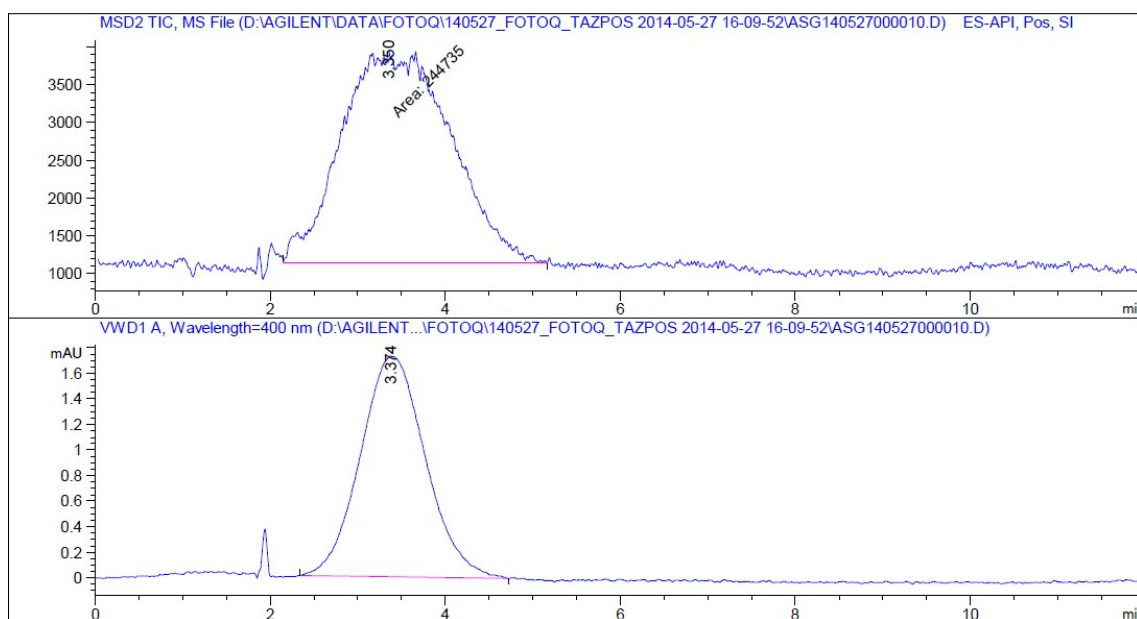

**Figure S3:** Chromatogram of TAZPo **3** using mass scan mode (top) and UV/Vis detection at 400 nm (bottom).

## 2.4 Synthesis of 2-(*N,N*-diethylamino)thiazolo[4,5-*c*]2,7,12,17-tetraphenylporphycene

2-(*N,N*-diethylamino)thiazolo[4,5-*c*]2,7,12,17-tetraphenylporphycene (ATAZPo **4** in Figure S1) was prepared in agreement with previously reported synthetic procedures.<sup>1</sup> Briefly, PoITC **1** (3 mg,  $4.6 \cdot 10^{-3}$  mmol) was stirred with diethylamine (4  $\mu$ g, 0.04 mmol, 10 eq) in 2 mL of  $CH_2Cl_2$  for 5 h at room temperature. Acidic water was added to the mixture and the product was extracted with  $CH_2Cl_2$ . The organic layers were washed three times with brine and then dried with anhydrous  $Na_2SO_4$ . The solvent was evaporated and the remaining crude was further purified by silica gel chromatography eluting with *n*-hexane:toluene in gradient mode, starting from a 3:1 ratio to 0:1 to provide a green product (3 mg,  $3.9 \cdot 10^{-3}$  mmol, 90 %).  $^1H$  NMR (400 MHz,  $CDCl_3$ )  $\delta$ /ppm = 9.61 (d,  $J$  = 11.0 Hz, 1H), 9.49 (d,  $J$  = 11.0 Hz, 1H), 9.41 (d,  $J$  = 1.0 Hz, 1H), 9.39 (s, 1H), 9.37-9.36 (s, 2H), 8.28-8.24 (m, 4H), 8.04-8.02 (m, 2H), 7.98 – 7.92 (m, 2H), 7.81 – 7.59 (m, 12H), 7.56 – 7.48 (m, 2H), 6.09 (s, 1H), 5.49 (s, 1H), 3.36 (q,  $J$  = 7.0 Hz, 4H), 1.13 (t,  $J$  = 7.0 Hz, 6H).  $^{13}C$  NMR (100 MHz,  $CDCl_3$ )  $\delta$ /ppm = 165.0, 145.1, 144.6, 143.6, 143.6, 143.0, 142.9, 140.9, 140.9, 137.6, 136.8, 136.5, 136.2, 135.0, 134.3, 134.0, 131.3, 131.2, 130.8, 130.5, 129.0, 128.9, 128.8, 128.5, 127.9, 127.7, 127.7, 127.5, 126.2, 125.1, 123.4, 115.8, 112.1, 52.8, 29.7. MS (API-ES) Calculated for  $C_{49}H_{38}N_6S [(M+H)^+]$ : 743.29. Found:  $m/z=743.2$ . Retention time: 20.03 min.

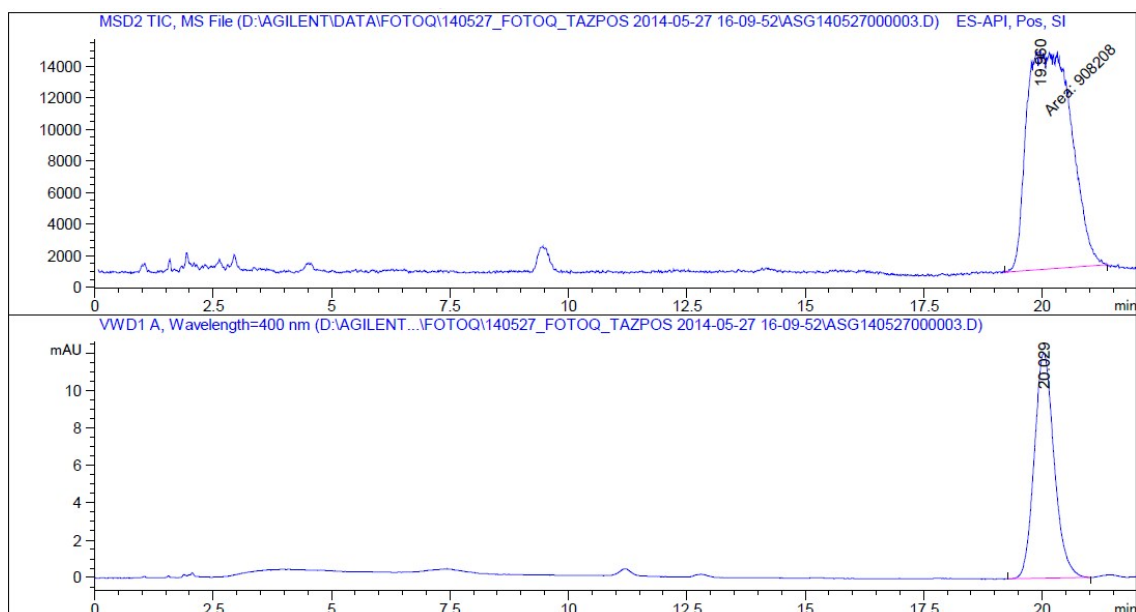

**Figure S4:** Chromatogram of ATAZPo **4** using mass scan mode (top) and UV/Vis detection at 400 nm (bottom).

### 3. Additional experiments

#### 3.1 HFIP effects on the absorption and fluorescence emission spectra of ATAZPo **2**

ATAZPo **2** (1.34  $\mu\text{M}$ ) was dissolved in 1 mL of methanol and the absorption and fluorescence spectra were collected after the addition of increasing amounts of 1,1,1,3,3,3-hexafluoro-2-propanol (HFIP) 5.9 M. Dilution-corrected absorption and fluorescence emission spectra of the titration experiments are presented below (Figure S5).

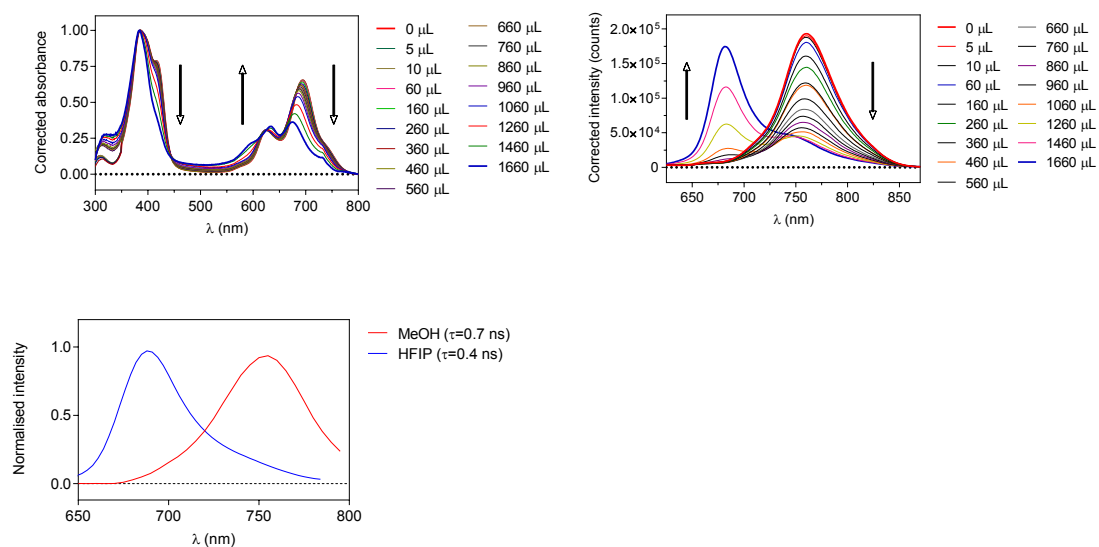

**Figure S5:** Dilution-corrected absorption (top-left) and normalized fluorescence emission spectra (top-right) of ATAZPo **2** in MeOH with increasing volumes of HFIP 5.9 M. Bottom: time-resolved fluorescence emission spectra of ATAZPo **2** in MeOH (red line) and in HFIP (blue).

### 3.2 Excitation spectra of ATAZPo 2 in different solvents

Excitation spectra of ATAZPo 2 were measured in MeOH, HFIP and TFE by observing at 675 and 790 nm. Results are presented in figure S6.

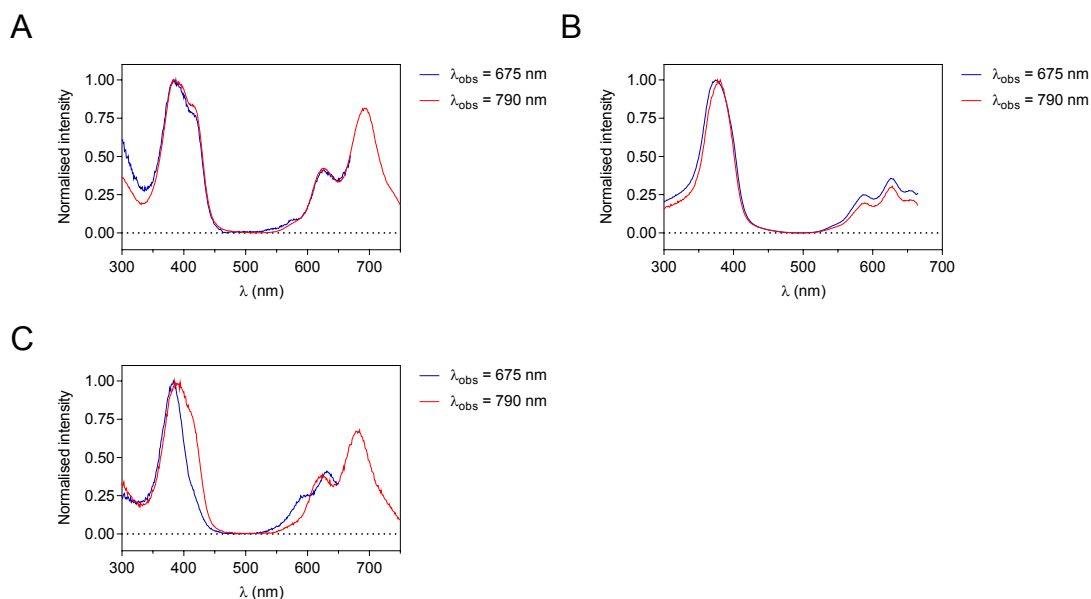

**Figure S6:** Excitation spectra of ATAZPo 2 in MeOH (A), HFIP (B) and TFE (C) by observing at 675 (blue line) and 790 nm (red line).

### 3.3 Linear solvation energy relationships

Fitting values of the linear solvation energy relationships with the Kamlet-Taft and Catalan parameters are presented in Table S2. Fittings of Eq.1 and Eq.2 are presented in Figure S7.

**Table S2.** Fitting values for the dependence of  $\lambda_{Max}^{Abs}$  (expressed in  $\text{cm}^{-1}$ ) of ATAZPo 2 on the Kamlet-Taft and Catalan solvent parameters.

| $\bar{\nu}_A = \bar{\nu}_0 + a\pi^* + d\delta + b\alpha + c\beta$ |               |          |       |          |
|-------------------------------------------------------------------|---------------|----------|-------|----------|
|                                                                   | $\bar{\nu}_0$ | $a$      | $b$   | $c$      |
| Coeff.                                                            | 14574.9       | -123.1   | 27.4  | -327.6   |
| $\pm$                                                             | 24.9          | 33.6     | 18.4  | 27.9     |
| t-stat                                                            | 585.5         | -3.7     | 1.5   | -11.7    |
| P(2-tail)                                                         | <0.0001       | <0.0023  | 0.159 | <0.0001  |
| N = 19                                                            |               | R = 0.96 |       | F = 55.7 |
| $\bar{\nu}_A = \bar{\nu}_0 + aSPP + bSA + cSB$                    |               |          |       |          |
|                                                                   | $\bar{\nu}_0$ | $a$      | $b$   | $c$      |
| Coeff.                                                            | 14839.6       | -439.8   | 99.1  | -301.1   |
| $\pm$                                                             | 81            | 107.3    | 38.3  | 42.1     |
| t-stat                                                            | 183.3         | -4.1     | 2.6   | -7.2     |
| P(2-tail)                                                         | <0.0001       | 0.0009   | 0.021 | <0.0001  |
| N= 19                                                             |               | R= 0.94  |       | F= 36.6  |

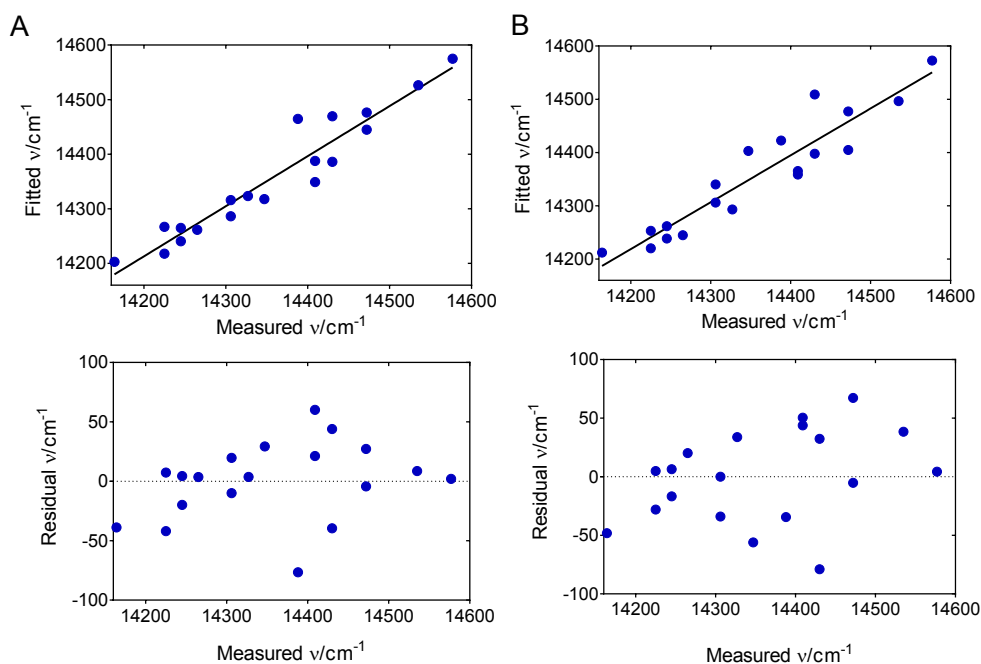

**Figure S7:** Top: plot of  $\bar{\nu}_A$  (exp) vs.  $\bar{\nu}_A$  (calc) for the absorption maxima of ATAZPo 2 in several solvents. Calculated  $\bar{\nu}_A$  values according to equations  $\bar{\nu}_A = 14574.9 - 123.1 \pi^* + 27.4 \alpha - 327.6 \beta$  (A) and  $\bar{\nu}_A = 14839.6 - 439.8 \text{ SPP} + 99.1 \text{ SA} - 301.1 \text{ SB}$  (B). Bottom: Plot of the residuals of  $\bar{\nu}_A$  vs.  $\bar{\nu}_A$  (exp)

### 3.4 Acid effect on the absorption and fluorescence emission spectra of ATAZPo 2

ATAZPo 2 (1.34  $\mu\text{M}$ ) was dissolved in 1 mL of methanol and the absorption and fluorescence spectra were collected after the addition of increasing amounts of mineral and organic acids. Dilution-corrected absorption and fluorescence emission spectra of the titration experiments are presented below for all acids tested (Figures S8-S9).



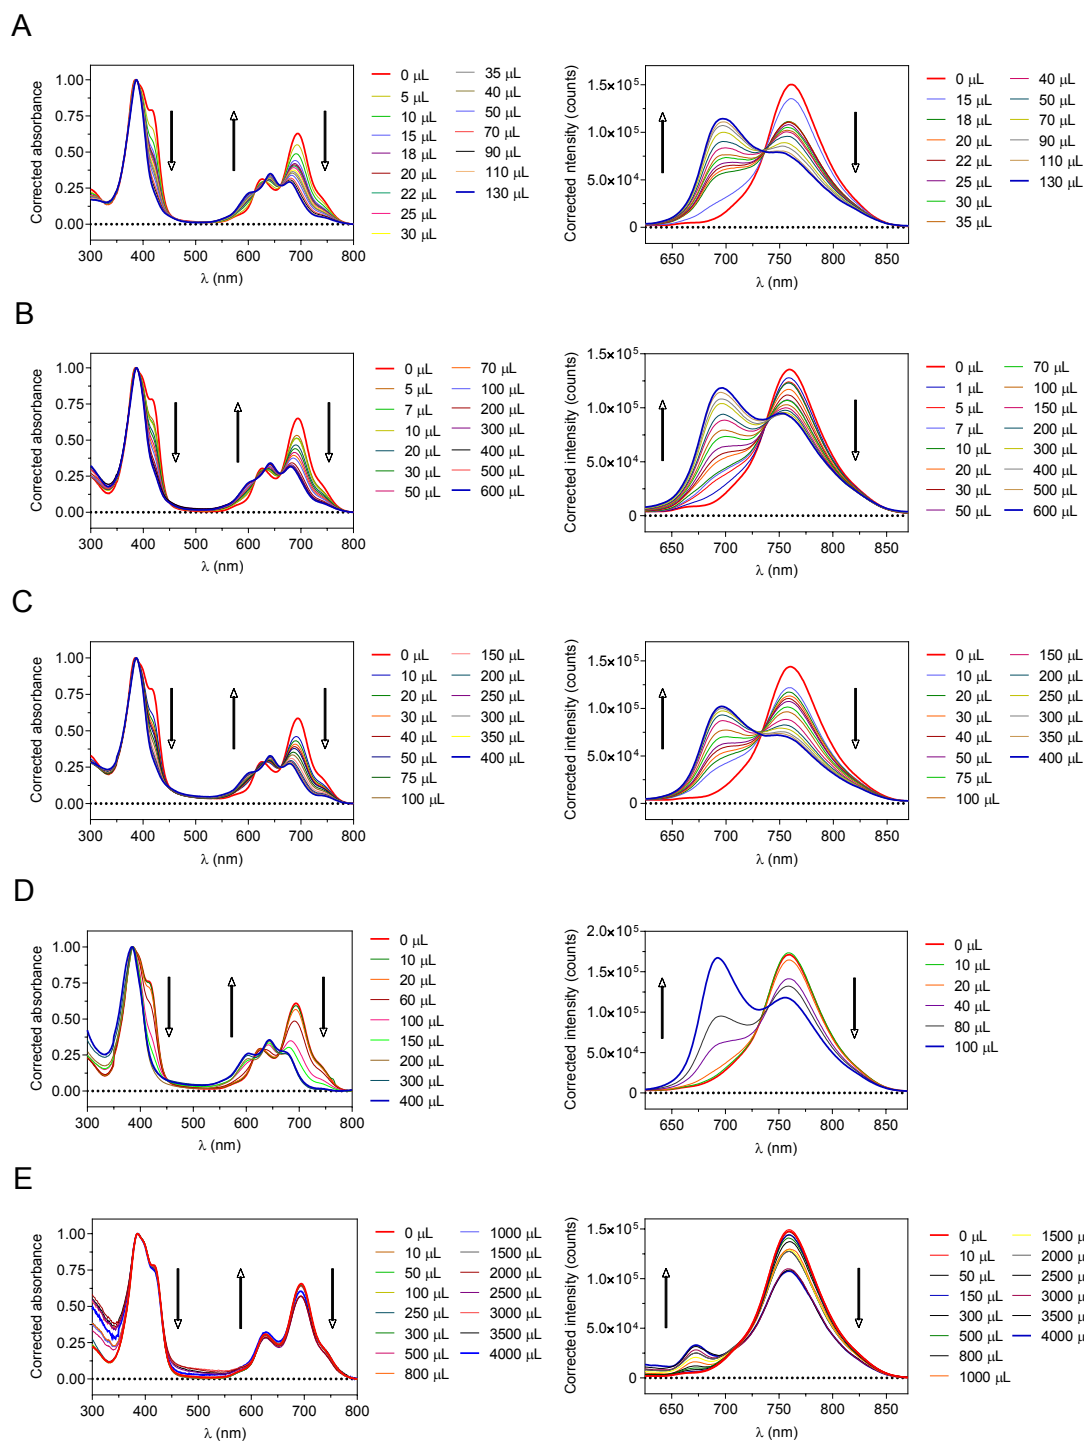

**Figure S8:** Dilution-corrected absorption (left) and normalized fluorescence emission spectra (right) of ATAZPo 2 in MeOH with increasing volumes of (A) HCl 0.05 M, (B) HNO<sub>3</sub> 0.103 M, (C) H<sub>2</sub>SO<sub>4</sub> 0.01 M, (D) H<sub>3</sub>PO<sub>4</sub> 8.67 M and (E) H<sub>3</sub>BO<sub>3</sub> 3.23 M.

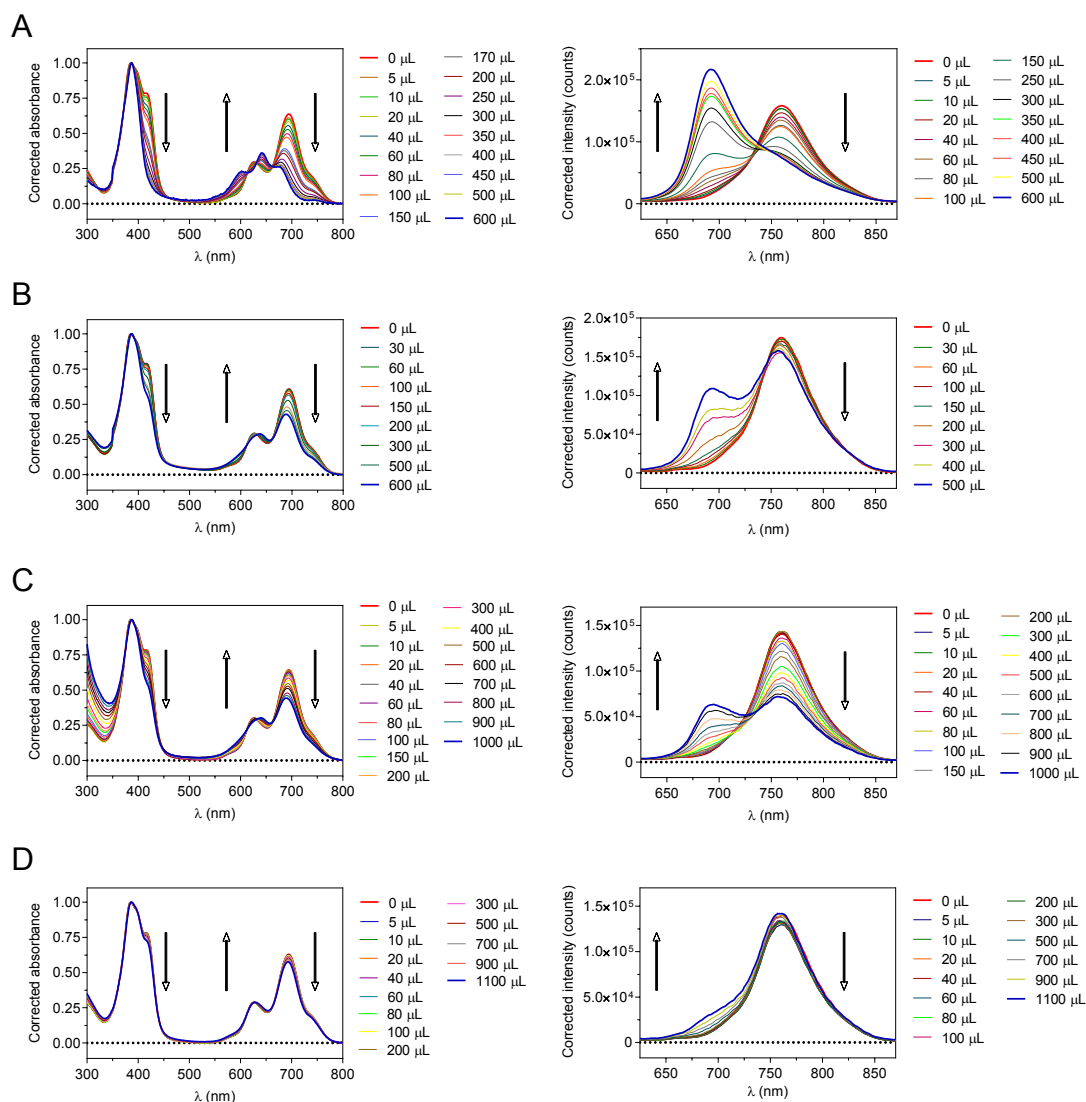

**Figure S9:** Dilution-corrected absorption (left) and normalized fluorescence emission spectra (right) of ATAZPo 2 in MeOH with increasing volumes of (A) formic acid 22.5 M, (B) acetic acid 16.6 M, (C) propionic acid 9.4 M and (D) lactic acid 13.4 M.

### 3.5 HFIP and acid effects on the absorption and fluorescence emission spectra of 2,7,12,17-tetraphenylporphycene

2,7,12,17-tetraphenylporphycene (TPPo) was dissolved in 1 mL of MeOH and the absorption and fluorescence spectra were collected after the addition of 1,1,1,3,3,3-hexafluoro-2-propanol (HFIP) 5.9 M and HCl 0.05 M (Figure S10).

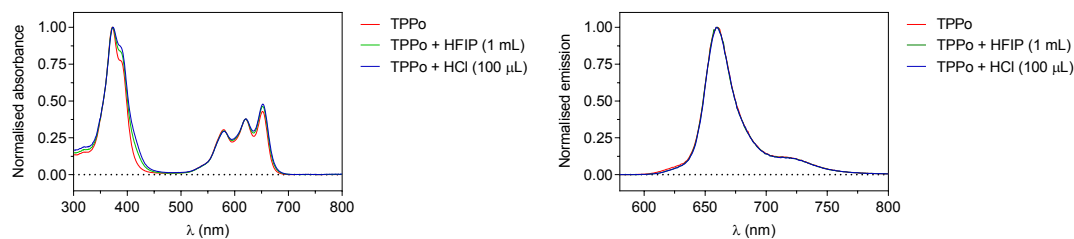

**Figure S10:** Dilution-corrected absorption (left) and normalized fluorescence emission spectra (right) of TPPo in MeOH (red line) and in MeOH-HFIP (green) and MeOH-HCl (blue) mixtures. The stock concentrations of HFIP and HCl were 5.9 M and 0.05 M respectively.

### 3.6 HFIP and acid effects on the absorption spectra of 9-amino-2,7,12,17-tetrakis(2-methoxyethyl)porphycene

Absorption spectra of 9-amino-2,7,12,17-tetrakis(2-methoxyethyl)porphycene in THF and HFIP is shown in Figure S11.

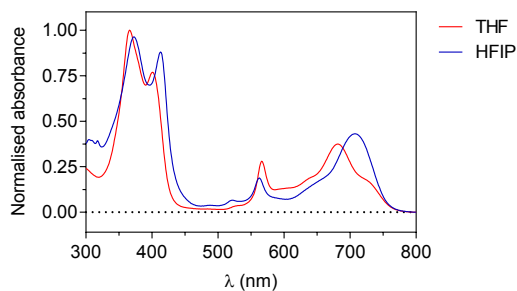

**Figure S11:** Normalised absorption spectra of 9-amino-2,7,12,17-tetrakis(2-methoxyethyl)porphycene in THF (red line) and HFIP (blue line).

### 3.7 HFIP effects on the absorption and fluorescence emission spectra of 2-phenylthiazolo[4,5-c]2,7,12,17-tetraphenylporphycene (TAZPo 3)

Absorption spectra and time-resolved emission spectra of 2-phenylthiazolo[4,5-c]2,7,12,17-tetraphenylporphycene in MeOH and HFIP are shown in Figure S12.

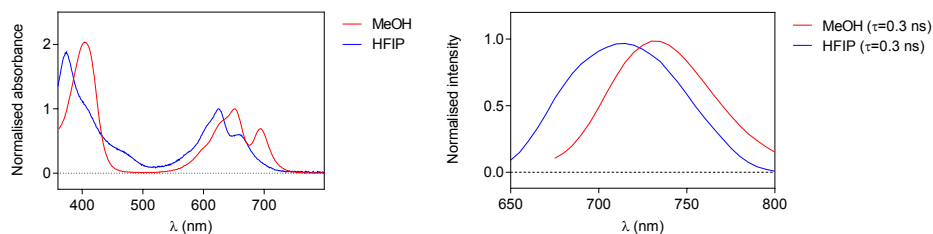

**Figure S12:** Absorption and time-resolved emission spectra of TAZPo 3 in MeOH and HFIP.

### 3.8 HFIP and acid effects on the absorption and fluorescence emission spectra of ATAZPo 4

ATAZPo 4 was dissolved in 1 mL of MeOH and the absorption and fluorescence spectra were collected after the addition of 2 mL of 1,1,1,3,3,3-hexafluoro-2-propanol (HFIP) 5.9 M and 100  $\mu$ L of HCl 12 M (Figure S13).

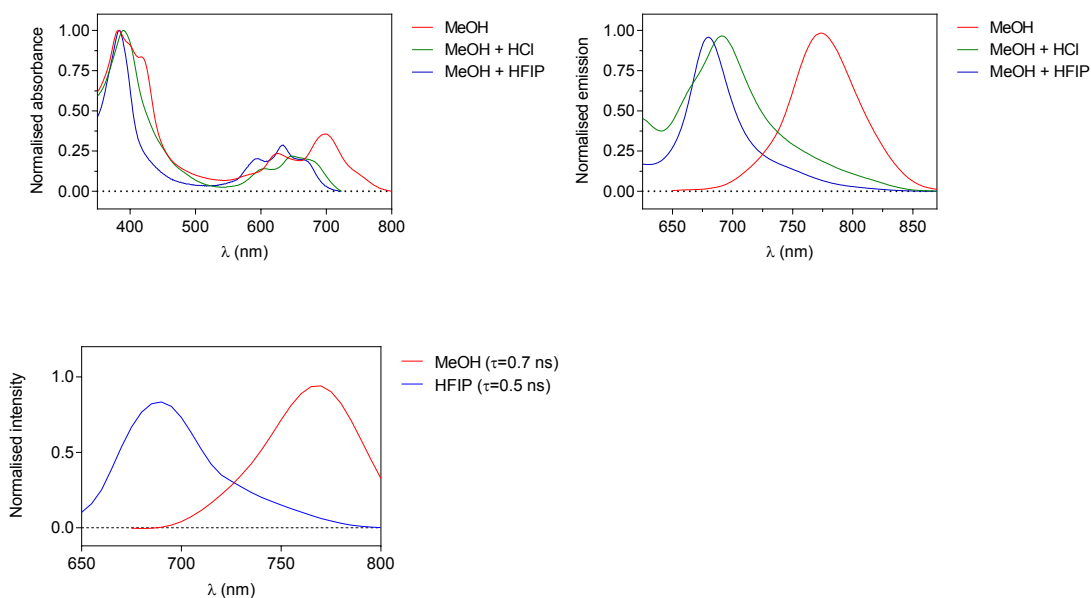

**Figure S13:** Dilution-corrected absorption (top-left) and normalized fluorescence emission spectra (top-right) of ATAZPo 4 in MeOH (red line) and in MeOH-HCl (green) and MeOH-HFIP (blue) mixtures. The stock concentrations of HFIP and HCl were 5.9 M and 12 M respectively. Bottom: time-resolved fluorescence emission spectra of ATAZPo 4 in MeOH (red line) and in HFIP (blue).

## 4. References

1. O. Planas, T. Gallavardin, and S. Nonell, *Chem. Commun.*, 2015, **51**, 5586–5589.
